# Supplementary material for: Context matters in genomic data sharing: a qualitative investigation into responses from the Australian public
Source: PubMed Central journal article supplement (PMC10068139; doi:10.1186/s12920-023-01452-8), 2023-04-01

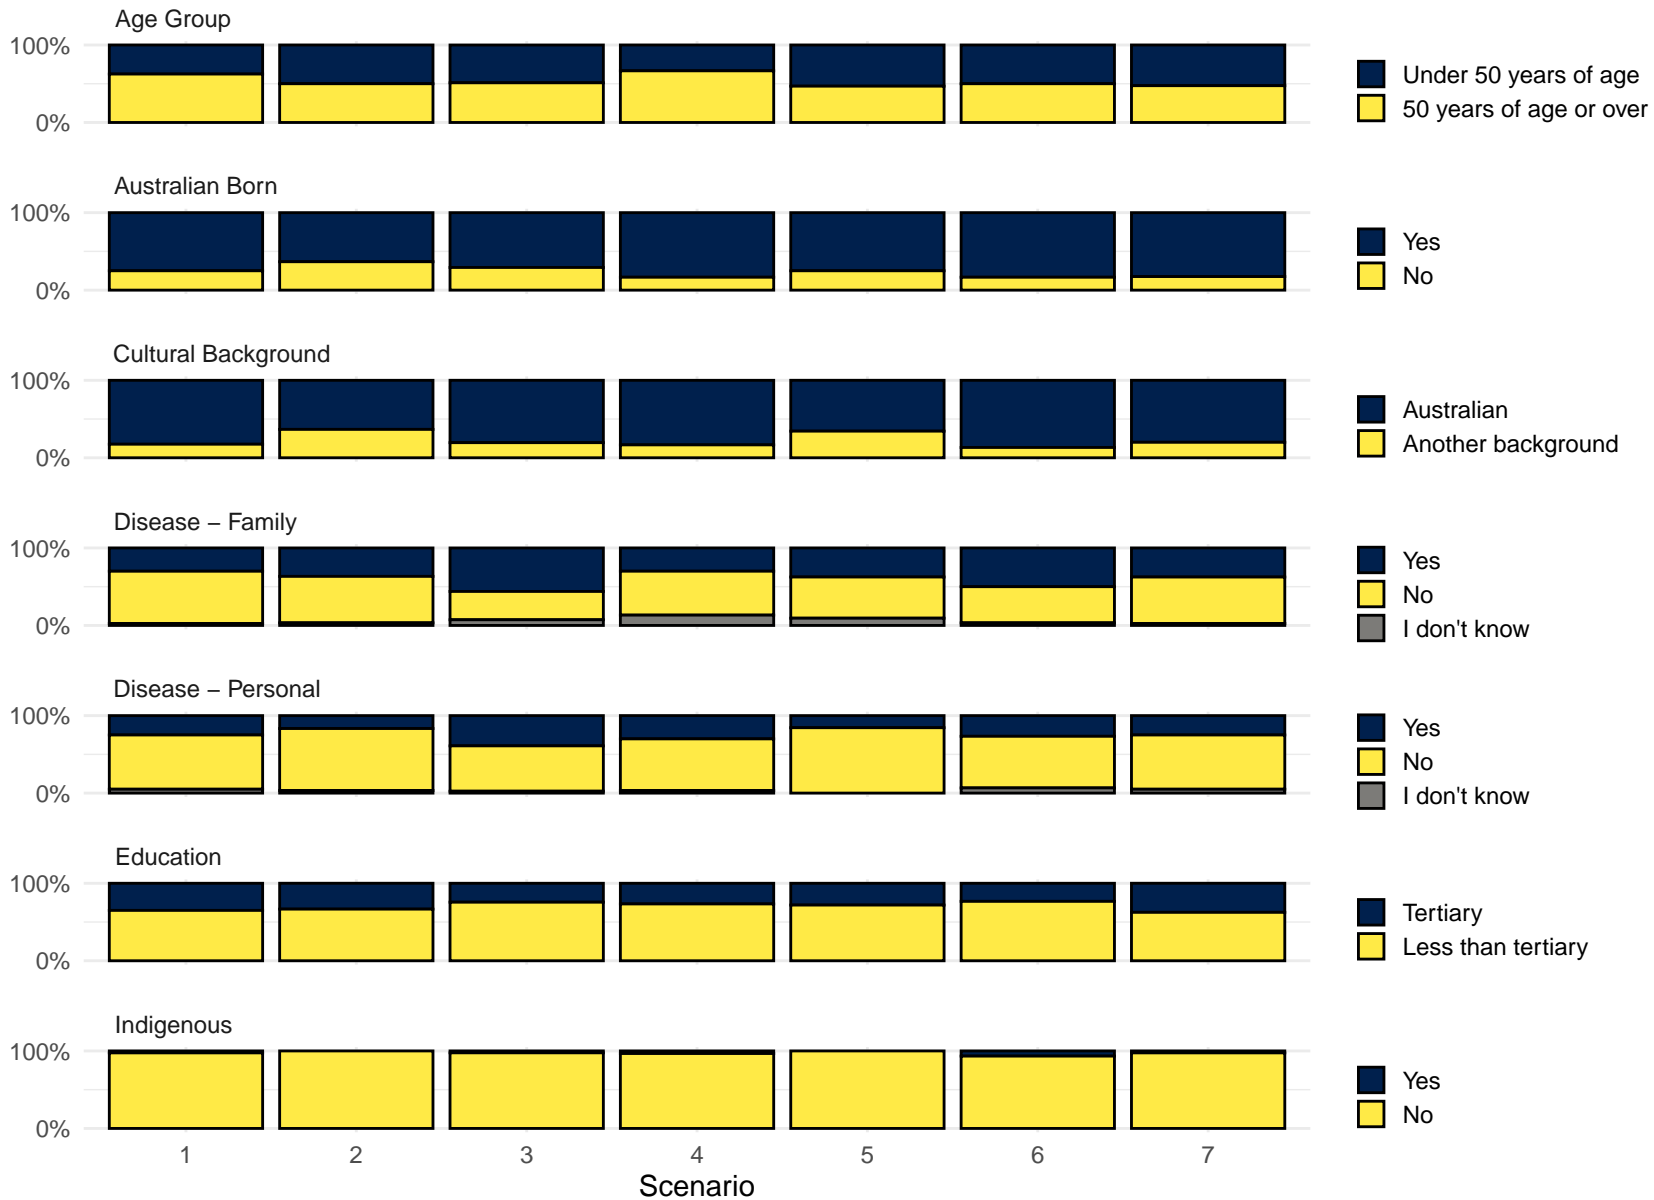

Supplement: 12920_2023_1452_MOESM3_ESM.pdf [file 12920_2023_1452_MOESM3_ESM.pdf]
